# Supplementary material
Source: PubMed Central journal article supplement (PMC8162925)
Supplement: NIHMS1702013-supplement-Supplemental_doc.pdf [file NIHMS1702013-supplement-Supplemental_doc.pdf]

## **Supplementary information**

---

# **Podocytopathies**

---

In the format provided by the  
authors and unedited

**Supplementary Table 1. Genetic forms of podocytopathies.**

| Clinical phenotype     | Pathology            | Gene            | Inheritance | OMIM name                                                          | OMIM ID  | Ref |
|------------------------|----------------------|-----------------|-------------|--------------------------------------------------------------------|----------|-----|
| <b>Podocyte genes</b>  |                      |                 |             |                                                                    |          |     |
| SRNS                   | FSGS                 | <i>ACTN4</i>    | AD          | Glomerulosclerosis, focal segmental, 1                             | * 604638 | 1   |
| SRNS                   | FSGS                 | <i>ADCK4</i>    | AR          | Nephrotic syndrome, type 9                                         | * 615567 | 2   |
| SRNS, proteinuria      | FSGS                 | <i>ANLN</i>     | AD          | Focal segmental glomerulosclerosis 8                               | * 616027 | 3   |
| SRNS                   | FSGS                 | <i>ARHGAP24</i> | AR          | *Nephrotic syndrome                                                | * 610586 | 4   |
| SRNS                   | FSGS                 | <i>ARHGDI1</i>  | AR          | Nephrotic syndrome, type 8                                         | * 601925 | 5   |
| SRNS                   | FSGS                 | <i>CD2AP</i>    | AR, AD      | Glomerulosclerosis, focal segmental, 3                             | * 604241 | 6   |
| CNS, SSNS, SDNS, SRNS  | MCD, FSGS            | <i>CDK20</i>    | AR          | *Nephrotic syndrome                                                | * 610076 | 7   |
| SRNS                   | FSGS                 | <i>CRB2</i>     | AR          | Focal segmental glomerulosclerosis 9                               | * 609720 | 8   |
| NS                     | FSGS                 | <i>DGKE</i>     | AR          | Nephrotic syndrome, type 7 and HUS, atypical, susceptibility to, 7 | * 601440 | 9   |
| SSNS, SRNS             | FSGS                 | <i>DLC1</i>     | AR          | *Nephrotic syndrome                                                | * 604258 | 7   |
| SSNS, SRNS             | FSGS                 | <i>EMP2</i>     | AR          | Nephrotic syndrome, type 10                                        | * 602334 | 10  |
| SRNS                   | FSGS                 | <i>INF2</i>     | AD          | Glomerulosclerosis, focal segmental, 5                             | * 613237 | 11  |
| SSNS, SRNS             | MCD, FSGS            | <i>ITSN1</i>    | AR          | *Nephrotic syndrome                                                | * 602442 | 7   |
| SDNS, SSNS             | MCD, MPGN            | <i>ITSN2</i>    | AR          | *Nephrotic syndrome                                                | * 604464 | 7   |
| CNS, SRNS              | MCD                  | <i>MAGI2</i>    | AR          | Nephrotic syndrome, type 15                                        | * 606382 | 12  |
| SRNS                   | FSGS                 | <i>MYO1E</i>    | AR          | Glomerulosclerosis, focal segmental, 6                             | * 601479 | 13  |
| CNS, SRNS              | PTRD, PMS, FSGS, MCD | <i>NPHS1</i>    | AR          | Nephrotic syndrome, type 1                                         | * 602716 | 14  |
| CNS, SRNS, proteinuria | FSGS, MCD            | <i>NPHS2</i>    | AR          | Nephrotic syndrome, type 2                                         | * 604766 | 15  |
| SRNS                   | FSGS                 | <i>NUP107</i>   | AR          | *Nephrotic syndrome                                                | * 607617 | 16  |
| SRNS                   | FSGS                 | <i>NUP205</i>   | AR          | *Nephrotic syndrome                                                | * 614352 | 17  |
| SRNS                   | FSGS                 | <i>NUP93</i>    | AR          | *Nephrotic syndrome                                                | * 614351 | 17  |
| Proteinuria            | FSGS                 | <i>SYNPO</i>    | AR          | *Nephrotic syndrome                                                | * 608155 | 18  |
| SRNS, proteinuria      | FSGS                 | <i>TRPC6</i>    | AD          | Glomerulosclerosis, focal segmental, 2                             | * 603652 | 19  |
| CNS, SRNS              | MCD, FSGS            | <i>PLCE1</i>    | AR          | Nephrotic syndrome, type 3                                         | * 608414 | 20  |
| Proteinuria            | FSGS                 | <i>PODXL</i>    | AR          | *Nephrotic syndrome                                                | * 602632 | 21  |
| SRNS                   | FSGS, MCD            | <i>PTPRO</i>    | AR          | Nephrotic syndrome, type 6                                         | * 600579 | 22  |
| SDNS, SSNS             | MCD, DMS, FSGS       | <i>TNS2</i>     | AR          | *Nephrotic syndrome                                                | * 607717 | 7   |

|                        |           |            |    |                            |        |
|------------------------|-----------|------------|----|----------------------------|--------|
| CNS, SRNS, proteinuria | DMS, SRNS | <i>WT1</i> | AD | Nephrotic syndrome, type 4 | 256370 |
|------------------------|-----------|------------|----|----------------------------|--------|

## Syndromal genes

|                                      |                       |               |        |                                                                                                          |                  |    |
|--------------------------------------|-----------------------|---------------|--------|----------------------------------------------------------------------------------------------------------|------------------|----|
| SRNS                                 | FSGS                  | <i>ALG1</i>   | AR     | Congenital disorder of glycosylation, type 1k                                                            | *605907          | 23 |
| SRNS, proteinuria                    | MCD, FSGS             | <i>COL4A3</i> | AR, AD | Alport syndrome 2, autosomal recessive, Alport syndrome 3, autosomal dominant                            | 203780<br>104200 | 24 |
| SRNS, proteinuria                    | FSGS                  | <i>COL4A4</i> | AR, AD | Alport syndrome 2, autosomal recessive                                                                   | *120131          | 24 |
| SRNS, proteinuria                    | FSGS                  | <i>COL4A5</i> | XLD    | Alport syndrome 1, X-linked                                                                              | *303630          | 25 |
| SRNS                                 | FSGS                  | <i>COQ2</i>   | AR     | Coenzyme Q10 deficiency, primary, 1                                                                      | * 609825         | 26 |
| SRNS                                 | FSGS                  | <i>COQ6</i>   | AR     | Coenzyme Q10 deficiency, primary, 6                                                                      | * 614650         | 27 |
| SRNS, proteinuria w or w/o hematuria | MCD, FSGS             | <i>CUBN</i>   | AR     | Megaloblastic anemia-1, Finnish type                                                                     | 261100           | 28 |
| Proteinuria                          | MCD                   | <i>CD151</i>  | AR     | Nephropathy with pretibial epidermolysis bullosa and deafness                                            | * 602243         | 29 |
| SRNS, proteinuria                    | FSGS                  | <i>CLCN5</i>  | XLR    | Proteinuria, low molecular weight, with hypercalciuric nephrocalcinosis Dent disease                     | 308990<br>300009 | 25 |
| SRNS, proteinuria                    | MCD, FSGS             | <i>CTNS</i>   | AR     | Cystinosis, atypical nephropathic                                                                        | 606272           | 25 |
| Proteinuria                          | FSGS                  | <i>E2F3</i>   | AD     | FSGS, mental retardation (gene deletion)                                                                 | *600427          | 30 |
| SRNS, proteinuria                    | FSGS, tubular atrophy | <i>FAT1</i>   | AR     | Glomerulotubular nephropathy with CNS involvement                                                        | *600976          | 31 |
| SRNS, proteinuria                    | FSGS                  | <i>GLA</i>    | XL     | Fabry disease                                                                                            | *301500          | 25 |
| SRNS, proteinuria                    | FSGS                  | <i>INF2</i>   | AD     | Charcot-Marie-Tooth disease, dominant intermediate E                                                     | * 614455         | 13 |
| SRNS                                 | FSGS                  | <i>ITGA3</i>  | AR     | Interstitial lung disease, nephrotic syndrome, epidermolysis bullosa, congenital                         | * 605025         | 32 |
| SRNS                                 | FSGS                  | <i>ITGB4</i>  | AR     | Epidermolysis bullosa                                                                                    | * 147557         | 33 |
| SRNS w or w/o haematuria             | FSGS                  | <i>KANK1</i>  | AR     | Cerebral palsy, spastic quadriplegic, 2                                                                  | * 607704         | 34 |
| SRNS w or w/o haematuria             | FSGS                  | <i>KANK2</i>  | AR     | Nephrotic syndrome, type 16                                                                              | * 614610         | 34 |
| SRNS w or w/o haematuria             | FSGS                  | <i>KANK4</i>  | AR     | Palmoplantar keratoderma and woolly hair Cerebral palsy, spastic quadriplegic, 2                         | * 614612         | 34 |
| SRNS                                 | FSGS                  | <i>LAMB2</i>  | AR     | Pierson syndrome Nephrotic syndrome, type 5, w or w/o ocular abnormalities                               | 609049<br>619149 | 35 |
| SRNS                                 | FSGS                  | <i>LMX1B</i>  | AR     | Nail-patella syndrome                                                                                    | *602575          | 36 |
| Proteinuria                          | MCD, FSGS             | <i>MYH9</i>   | AD     | Macrothrombocytopenia and granulocyte inclusions with or without nephritis or sensorineural hearing loss | * 160775         | 37 |
| Proteinuria                          | FSGS                  | <i>NXF5</i>   | XLD    | FSGS with progressive cardiac conduction disorder                                                        | * 300319         | 38 |
| Proteinuria                          | FSGS                  | <i>OCRL1</i>  | XLR    | Dent disease 2 Lowe syndrome                                                                             | 300555<br>309000 | 28 |
| SRNS, proteinuria                    | FSGS                  | <i>PAX2</i>   | AD     | Glomerulosclerosis, focal segmental, 7 Papillorenal syndrome                                             | 616002<br>120330 | 39 |
| SRNS                                 | FSGS                  | <i>PDSS2</i>  | AR     | Coenzyme Q10 deficiency, primary, 3                                                                      | * 610564         | 40 |
| CNS                                  | CG                    | <i>PMM2</i>   | AR     | Congenital defect of glycosylation                                                                       |                  | 41 |

|                   |           |                 |          |                                                                               |                  |          |
|-------------------|-----------|-----------------|----------|-------------------------------------------------------------------------------|------------------|----------|
| SRNS              | FSGS      | <i>SCARB2</i>   | AR       | Epilepsy, progressive myoclonic 4, with or without renal failure              | * 602257         | 42       |
| CNS, DMS, SRNS    | FSGS      | <i>SGPL1</i>    | AR       | Nephrotic syndrome, type 14 with ichthyosis and primary adrenal insufficiency | * 603729         | 43       |
| SRNS              | FSGS      | <i>SMARCAL1</i> | AR       | Schimke immunoosseous dysplasia                                               | * 606622         | 44       |
| SRNS              | FSGS      | <i>TTC21B</i>   | AR       | Nephronophthisis 12                                                           | *612014          | 45       |
| SRNS              | MCD       | <i>XPO5</i>     | AR       | Nephrotic syndrome with speech development delay                              | * 607845         | 17       |
| SRNS              | FSGS      | <i>WDR73</i>    | AR       | Galloway-Mowat syndrome 1                                                     | *6166144         | 46       |
| SRNS, proteinuria | FSGS, DMS | <i>WT1</i>      | AD<br>AD | Frasier syndrome<br>Denys Drash syndrome                                      | 136680<br>194080 | 47<br>48 |
| Proteinuria       | FSGS      | <i>ZMPSTE24</i> | AR       | Mandibuloacral dysplasia                                                      | *606480          | 49       |

CKD, chronic kidney disease; FSGS, focal segmental glomerulosclerosis; HCV, hepatitis C virus; MCD, minimal change disease; SRNS, steroid-resistant nephrotic syndrome; SSNS, steroid-sensitive nephrotic syndrome; SDNS, steroid-dependent nephrotic syndrome; FRNS, frequent-relapsing nephrotic syndrome; eGFR, estimated glomerular filtration rate; FPE, foot process effacement; ESKD, end stage kidney disease; DMS, diffuse mesangial sclerosis; w, with; w/o, without; OMIM, Online Mendelian Inheritance in Man.

## References

- Kaplan, J. M. *et al.* Mutations in ACTN4, encoding alpha-actinin-4, cause familial focal segmental glomerulosclerosis. *Nat Genet* **24**, 251-256, doi:10.1038/73456 (2000).
- Ashraf, S. *et al.* ADCK4 mutations promote steroid-resistant nephrotic syndrome through CoQ10 biosynthesis disruption. *J Clin Invest* **123**, 5179-5189, doi:10.1172/JCI69000 (2013).
- Gbadegesin, R. A. *et al.* Mutations in the gene that encodes the F-actin binding protein anillin cause FSGS. *J Am Soc Nephrol* **25**, 1991-2002, doi:10.1681/ASN.2013090976 (2014).
- Akilesh, S. *et al.* Arhgap24 inactivates Rac1 in mouse podocytes, and a mutant form is associated with familial focal segmental glomerulosclerosis. *J Clin Invest* **121**, 4127-4137, doi:10.1172/JCI46458 (2011).
- Gee, H. Y. *et al.* ARHGDI1 mutations cause nephrotic syndrome via defective RHO GTPase signaling. *J Clin Invest* **123**, 3243-3253, doi:10.1172/JCI69134 (2013).
- Kim, J. M. *et al.* CD2-associated protein haploinsufficiency is linked to glomerular disease susceptibility. *Science* **300**, 1298-1300, doi:10.1126/science.1081068 (2003).
- Ashraf, S. *et al.* Mutations in six nephrosis genes delineate a pathogenic pathway amenable to treatment. *Nat Commun* **9**, 1960, doi:10.1038/s41467-018-04193-w (2018).
- Ebarasi, L. *et al.* Defects of CRB2 cause steroid-resistant nephrotic syndrome. *Am J Hum Genet* **96**, 153-161, doi:10.1016/j.ajhg.2014.11.014 (2015).
- Ozaltin, F. *et al.* DGKE variants cause a glomerular microangiopathy that mimics membranoproliferative GN. *J Am Soc Nephrol* **24**, 377-384, doi:10.1681/ASN.2012090903 (2013).
- Gee, H. Y. *et al.* Mutations in EMP2 cause childhood-onset nephrotic syndrome. *Am J Hum Genet* **94**, 884-890, doi:10.1016/j.ajhg.2014.04.010 (2014).
- Boyer, O. *et al.* Mutations in INF2 are a major cause of autosomal dominant focal segmental glomerulosclerosis. *J Am Soc Nephrol* **22**, 239-245, doi:10.1681/ASN.2010050518 (2011).
- Bierzynska, A. *et al.* MAGI2 Mutations Cause Congenital Nephrotic Syndrome. *J Am Soc Nephrol* **28**, 1614-1621, doi:10.1681/ASN.2016040387 (2017).

- 13 Boyer, O. *et al.* INF2 mutations in Charcot-Marie-Tooth disease with glomerulopathy. *N Engl J Med* **365**, 2377-2388, doi:10.1056/NEJMoa1109122 (2011).
- 14 Philippe, A. *et al.* Nephtrin mutations can cause childhood-onset steroid-resistant nephrotic syndrome. *J Am Soc Nephrol* **19**, 1871-1878, doi:10.1681/ASN.2008010059 (2008).
- 15 Boute, N. *et al.* NPHS2, encoding the glomerular protein podocin, is mutated in autosomal recessive steroid-resistant nephrotic syndrome. *Nat Genet* **24**, 349-354, doi:10.1038/74166 (2000).
- 16 Miyake, N. *et al.* Biallelic Mutations in Nuclear Pore Complex Subunit NUP107 Cause Early-Childhood-Onset Steroid-Resistant Nephrotic Syndrome. *Am J Hum Genet* **97**, 555-566, doi:10.1016/j.ajhg.2015.08.013 (2015).
- 17 Braun, D. A. *et al.* Mutations in nuclear pore genes NUP93, NUP205 and XPO5 cause steroid-resistant nephrotic syndrome. *Nat Genet* **48**, 457-465, doi:10.1038/ng.3512 (2016).
- 18 Dai, S. *et al.* Functional analysis of promoter mutations in the ACTN4 and SYNPO genes in focal segmental glomerulosclerosis. *Nephrol Dial Transplant* **25**, 824-835, doi:10.1093/ndt/gfp394 (2010).
- 19 Gigante, M. *et al.* TRPC6 mutations in children with steroid-resistant nephrotic syndrome and atypical phenotype. *Clin J Am Soc Nephrol* **6**, 1626-1634, doi:10.2215/CJN.07830910 (2011).
- 20 Hinkes, B. *et al.* Positional cloning uncovers mutations in PLCE1 responsible for a nephrotic syndrome variant that may be reversible. *Nat Genet* **38**, 1397-1405, doi:10.1038/ng1918 (2006).
- 21 Barua, M. *et al.* Exome sequencing and in vitro studies identified podocalyxin as a candidate gene for focal and segmental glomerulosclerosis. *Kidney Int* **85**, 124-133, doi:10.1038/ki.2013.354 (2014).
- 22 Ozaltin, F. *et al.* Disruption of PTPRO causes childhood-onset nephrotic syndrome. *Am J Hum Genet* **89**, 139-147, doi:10.1016/j.ajhg.2011.05.026 (2011).
- 23 Kranz, C. *et al.* Congenital disorder of glycosylation type Ik (CDG-Ik): a defect of mannosyltransferase I. *Am J Hum Genet* **74**, 545-551, doi:10.1086/382493 (2004).
- 24 Voskarides, K. *et al.* COL4A3/COL4A4 mutations producing focal segmental glomerulosclerosis and renal failure in thin basement membrane nephropathy. *J Am Soc Nephrol* **18**, 3004-3016, doi:10.1681/ASN.2007040444 (2007).
- 25 Landini, S. *et al.* Reverse Phenotyping after Whole-Exome Sequencing in Steroid-Resistant Nephrotic Syndrome. *Clin J Am Soc Nephrol*, doi:10.2215/CJN.06060519 (2019).
- 26 Quinzii, C. *et al.* A mutation in para-hydroxybenzoate-polyprenyl transferase (COQ2) causes primary coenzyme Q10 deficiency. *Am J Hum Genet* **78**, 345-349, doi:10.1086/500092 (2006).
- 27 Heeringa, S. F. *et al.* COQ6 mutations in human patients produce nephrotic syndrome with sensorineural deafness. *J Clin Invest* **121**, 2013-2024, doi:10.1172/JCI45693 (2011).
- 28 Kaneko, K., Hasui, M., Hata, A., Hata, D. & Nozu, K. Focal segmental glomerulosclerosis in a boy with Dent-2 disease. *Pediatr Nephrol* **25**, 781-782, doi:10.1007/s00467-009-1362-z (2010).
- 29 Karamatic Crew, V. *et al.* CD151, the first member of the tetraspanin (TM4) superfamily detected on erythrocytes, is essential for the correct assembly of human basement membranes in kidney and skin. *Blood* **104**, 2217-2223, doi:10.1182/blood-2004-04-1512 (2004).
- 30 Izu, A. *et al.* Pathogenesis of focal segmental glomerular sclerosis in a girl with the partial deletion of chromosome 6p. *Tohoku J Exp Med* **223**, 187-192, doi:10.1620/tjem.223.187 (2011).
- 31 Gee, H. Y. *et al.* FAT1 mutations cause a glomerulotubular nephropathy. *Nat Commun* **7**, 10822, doi:10.1038/ncomms10822 (2016).
- 32 Has, C. *et al.* Integrin alpha3 mutations with kidney, lung, and skin disease. *N Engl J Med* **366**, 1508-1514, doi:10.1056/NEJMoa1110813 (2012).
- 33 Kambham, N. *et al.* Congenital focal segmental glomerulosclerosis associated with beta4 integrin mutation and epidermolysis bullosa. *Am J Kidney Dis* **36**, 190-196, doi:10.1053/ajkd.2000.8293 (2000).
- 34 Gee, H. Y. *et al.* KANK deficiency leads to podocyte dysfunction and nephrotic syndrome. *J Clin Invest* **125**, 2375-2384, doi:10.1172/JCI79504 (2015).
- 35 Zenker, M. *et al.* Human laminin beta2 deficiency causes congenital nephrosis with mesangial sclerosis and distinct eye abnormalities. *Hum Mol Genet* **13**, 2625-2632, doi:10.1093/hmg/ddh284 (2004).
- 36 Lemley, K. V. Kidney disease in nail-patella syndrome. *Pediatr Nephrol* **24**, 2345-2354, doi:10.1007/s00467-008-0836-8 (2009).
- 37 Furlano, M. *et al.* MYH9 Associated nephropathy. *Nefrologia* **39**, 133-140, doi:10.1016/j.nefro.2018.08.008 (2019).
- 38 Esposito, T. *et al.* Unique X-linked familial FSGS with co-segregating heart block disorder is associated with a mutation in the NXF5 gene. *Hum Mol Genet* **22**, 3654-3666, doi:10.1093/hmg/ddt215 (2013).

- 39 Barua, M. *et al.* Mutations in PAX2 associate with adult-onset FSGS. *J Am Soc Nephrol* **25**, 1942-1953, doi:10.1681/ASN.2013070686 (2014).
- 40 Lopez, L. C. *et al.* Leigh syndrome with nephropathy and CoQ10 deficiency due to decaprenyl diphosphate synthase subunit 2 (PDSS2) mutations. *Am J Hum Genet* **79**, 1125-1129, doi:10.1086/510023 (2006).
- 41 van der Knaap, M. S. *et al.* Congenital nephrotic syndrome: a novel phenotype of type I carbohydrate-deficient glycoprotein syndrome. *J Inherit Metab Dis* **19**, 787-791, doi:10.1007/bf01799174 (1996).
- 42 Berkovic, S. F. *et al.* Array-based gene discovery with three unrelated subjects shows SCARB2/LIMP-2 deficiency causes myoclonus epilepsy and glomerulosclerosis. *Am J Hum Genet* **82**, 673-684, doi:10.1016/j.ajhg.2007.12.019 (2008).
- 43 Lovric, S. *et al.* Mutations in sphingosine-1-phosphate lyase cause nephrosis with ichthyosis and adrenal insufficiency. *J Clin Invest* **127**, 912-928, doi:10.1172/JCI89626 (2017).
- 44 Boerkoel, C. F. *et al.* Mutant chromatin remodeling protein SMARCAL1 causes Schimke immunosseous dysplasia. *Nat Genet* **30**, 215-220, doi:10.1038/ng821 (2002).
- 45 Huynh Cong, E. *et al.* A homozygous missense mutation in the ciliary gene TTC21B causes familial FSGS. *J Am Soc Nephrol* **25**, 2435-2443, doi:10.1681/ASN.2013101126 (2014).
- 46 Colin, E. *et al.* Loss-of-function mutations in WDR73 are responsible for microcephaly and steroid-resistant nephrotic syndrome: Galloway-Mowat syndrome. *Am J Hum Genet* **95**, 637-648, doi:10.1016/j.ajhg.2014.10.011 (2014).
- 47 Barbaux, S. *et al.* Donor splice-site mutations in WT1 are responsible for Frasier syndrome. *Nat Genet* **17**, 467-470, doi:10.1038/ng1297-467 (1997).
- 48 Pelletier, J. *et al.* Germline mutations in the Wilms' tumor suppressor gene are associated with abnormal urogenital development in Denys-Drash syndrome. *Cell* **67**, 437-447, doi:10.1016/0092-8674(91)90194-4 (1991).
- 49 Agarwal, A. K. *et al.* Focal segmental glomerulosclerosis in patients with mandibuloacral dysplasia owing to ZMPSTE24 deficiency. *J Investig Med* **54**, 208-213, doi:10.2310/6650.2006.05068 (2006).
